# Supplementary material for: AutoCNV: a semiautomatic CNV interpretation system based on the 2019 ACMG/ClinGen Technical Standards for CNVs
Source: PubMed Central journal article supplement (PMC8496072; doi:10.1186/s12864-021-08011-4), 2021-10-06
Supplement: 12864_2021_8011_MOESM1_ESM.pdf [file 12864_2021_8011_MOESM1_ESM.pdf]

# Established BENIGN Genomics Region

Gene 1  Gene 2  Gene 3  Gene 4 

 Category 2C

Complete overlap, similar in size

 Category 2D

Completely contained within an established benign genomic region; dose not interrupt protein-coding genes

 Category 2E

Completely contained within an established benign genomic region; potentially interrupts protein-coding genes

 Category 2F

Overlaps, but dose not include additional protein-coding genes

 Category 2G

Overlaps, but includes additional protein-coding genes

 Category 2E'

Overlaps, but dose not include additional protein-coding genes; potentially interrupts protein-coding genes

 Category 2F'

Overlaps, but dose not include additional protein-coding genes; dose not interrupts protein-coding genes

Scenarios illustrated in the standards

Other scenarios
