# Supplementary material for: AutoCNV: a semiautomatic CNV interpretation system based on the 2019 ACMG/ClinGen Technical Standards for CNVs
Source: PubMed Central journal article supplement (PMC8496072; doi:10.1186/s12864-021-08011-4), 2021-10-06

# Automated scoring for copy-number loss

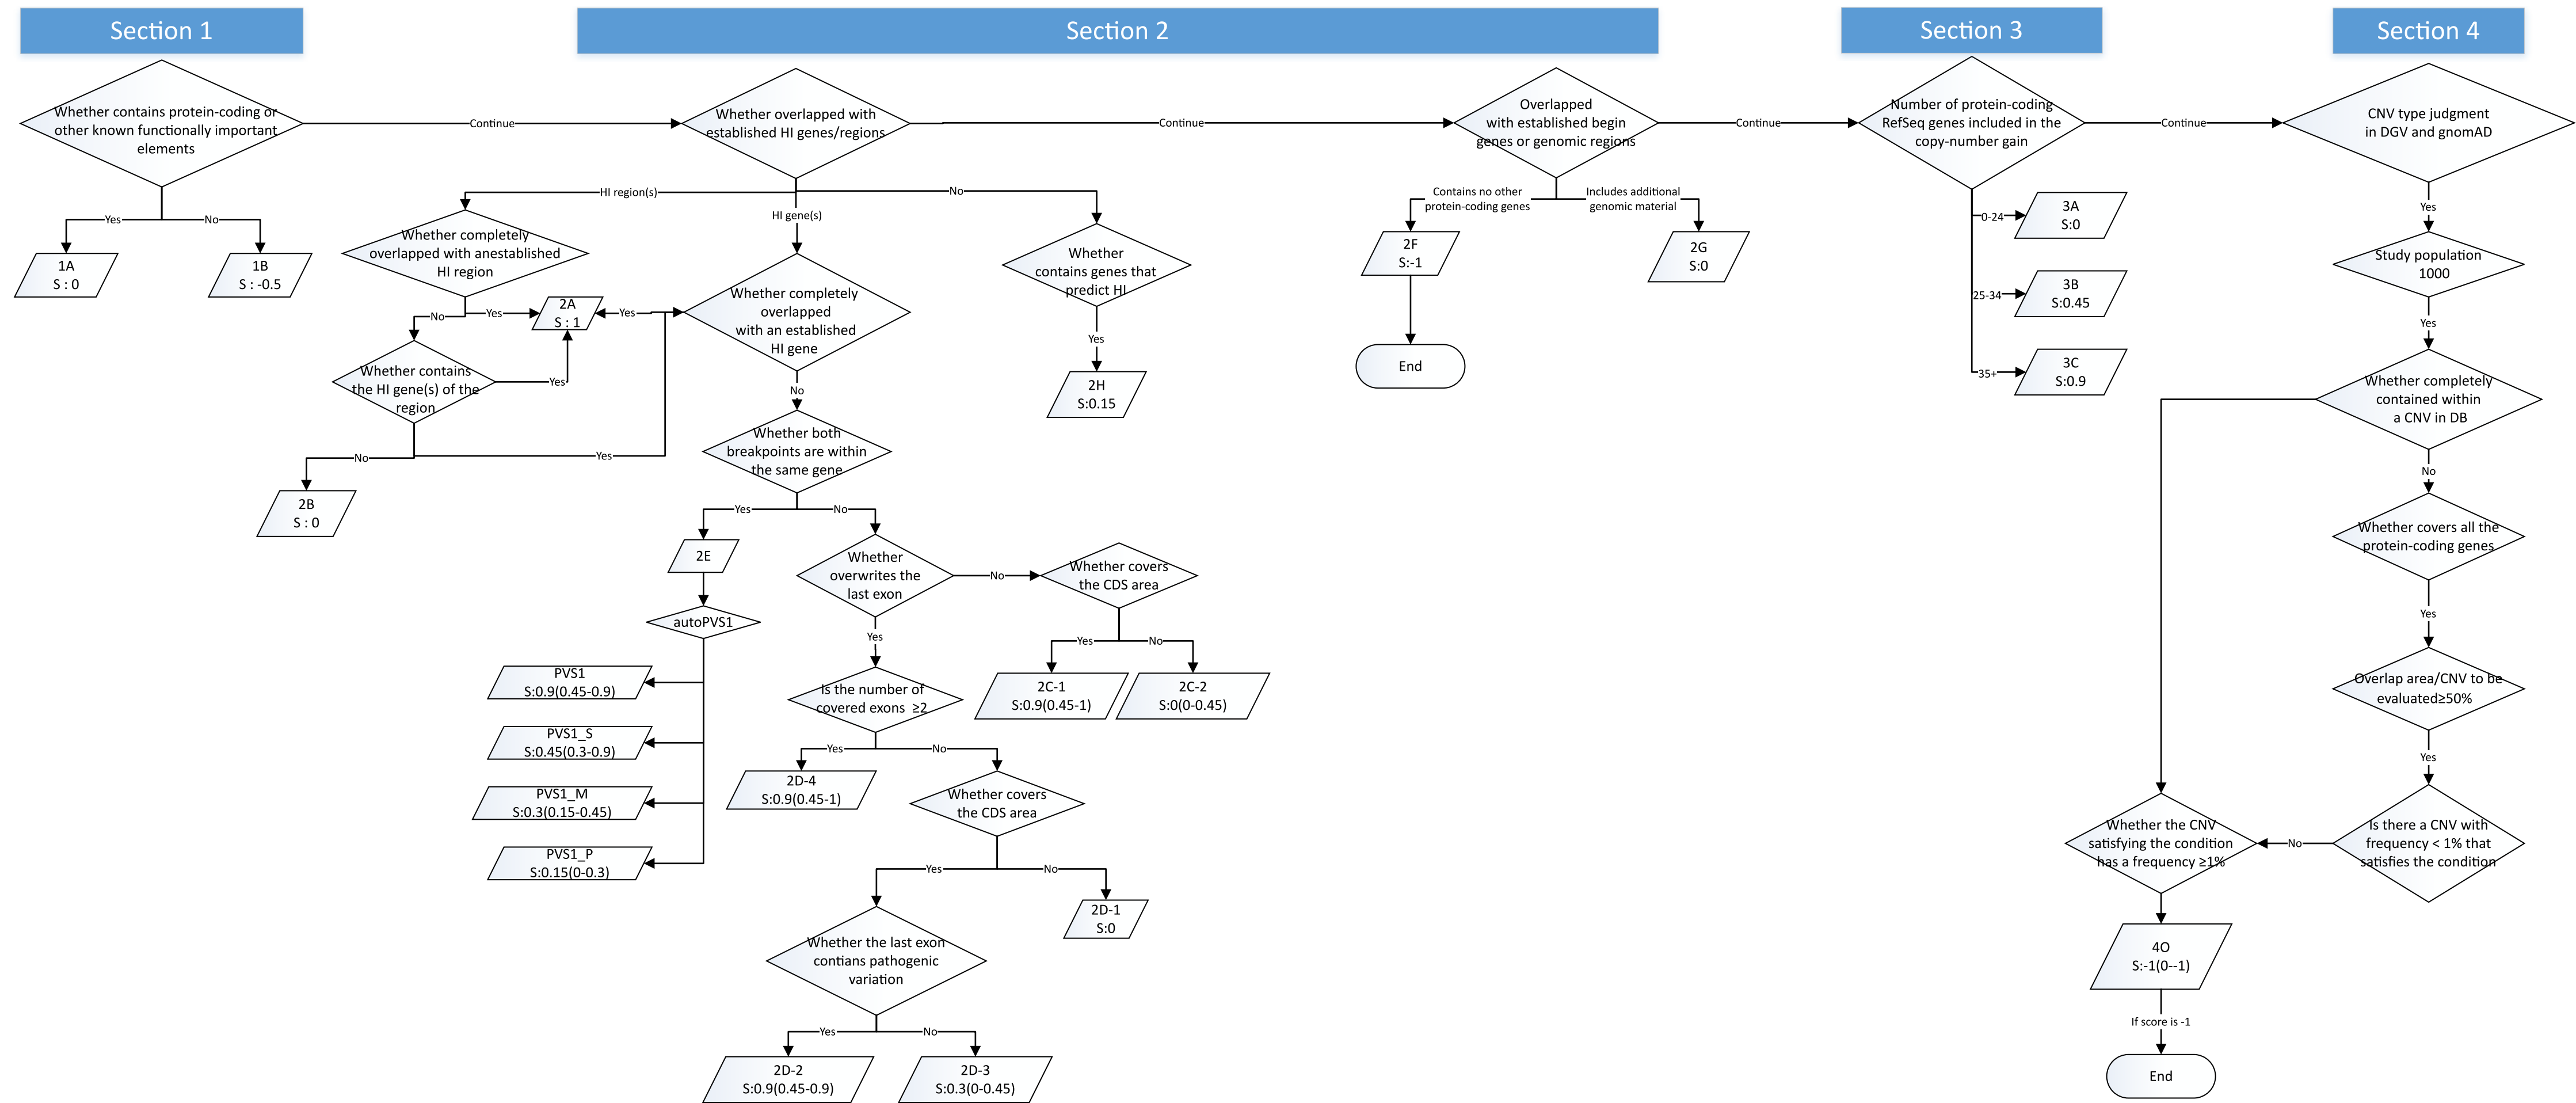

Supplement: 12864_2021_8011_MOESM2_ESM.pdf [file 12864_2021_8011_MOESM2_ESM.pdf]
