# Supplementary material for: AutoCNV: a semiautomatic CNV interpretation system based on the 2019 ACMG/ClinGen Technical Standards for CNVs
Source: PubMed Central journal article supplement (PMC8496072; doi:10.1186/s12864-021-08011-4), 2021-10-06
Supplement: 12864_2021_8011_MOESM4_ESM.pdf [file 12864_2021_8011_MOESM4_ESM.pdf]

Table S1 Comparative CNV interpretation between AutoCNV and complete manual interpretation in twenty illustrative case examples

| Patient | Chromosome | Start     | End       | Type        | Original Classification | Classification using AutoCNV |
|---------|------------|-----------|-----------|-------------|-------------------------|------------------------------|
| Case 2  | chr17      | 41784108  | 42438203  | Duplication | VUS                     | VUS                          |
| Case 4  | chr22      | 18912231  | 21465672  | Duplication | Pathogenic              | Pathogenic                   |
| Case W  | chr5       | 125989631 | 126295396 | Duplication | Pathogenic              | Pathogenic                   |
| Case X  | chr2       | 45408934  | 45976420  | Duplication | Benign                  | Likely benign                |
| Case Z  | chr19      | 18291753  | 18311626  | Duplication | Benign                  | Benign                       |
| Case 1  | chr12      | 27715516  | 29628080  | Deletion    | VUS                     | VUS                          |
| Case 3  | chr19      | 43242796  | 43741310  | Deletion    | Benign                  | Benign                       |
| Case U  | chr9       | 108597937 | 111269478 | Deletion    | Pathogenic              | Pathogenic                   |
| Case V  | chrX       | 23223505  | 23660309  | Deletion    | Pathogenic              | Pathogenic                   |
| Case Y  | chr4       | 69373811  | 69491113  | Deletion    | Benign                  | Benign                       |
| Case A  | chr12      | 12864101  | 14983330  | Deletion    | Pathogenic              | Pathogenic                   |
| Case B  | chr11      | 45904399  | 46480747  | Deletion    | Pathogenic              | Pathogenic                   |
| Case C  | chr18      | 53049652  | 53134356  | Deletion    | Pathogenic              | Pathogenic                   |
| Case D  | chr22      | 40654201  | 40659533  | Deletion    | VUS                     | VUS                          |
| Case E  | chr15      | 30507853  | 30807921  | Deletion    | Benign                  | Benign                       |
| Case F  | chr1       | 1379519   | 1435227   | Deletion    | Likely Benign           | Likely benign                |
| Case G  | chr13      | 20812000  | 21012000  | Deletion    | Benign                  | Benign                       |
| Case H  | chr17      | 553250    | 1353250   | Deletion    | Pathogenic              | Pathogenic                   |
| Case I  | chr22      | 31645547  | 32807482  | Deletion    | Pathogenic              | Pathogenic                   |
| Case J  | chr3       | 190380498 | 191783134 | Deletion    | VUS                     | VUS                          |
