# Supplementary material for: AutoCNV: a semiautomatic CNV interpretation system based on the 2019 ACMG/ClinGen Technical Standards for CNVs
Source: PubMed Central journal article supplement (PMC8496072; doi:10.1186/s12864-021-08011-4), 2021-10-06
Supplement: 12864_2021_8011_MOESM5_ESM.pdf [file 12864_2021_8011_MOESM5_ESM.pdf]

Supplementary Table 2 CNV interpretation using AutoCNV in 64 CNVs from the ClinVar database

| <b>RCVaccession</b> | <b>Chromosome</b> | <b>Start</b> | <b>End</b> | <b>Type</b> | <b>Original Classification</b> | <b>Classification using AutoCNV</b> |
|---------------------|-------------------|--------------|------------|-------------|--------------------------------|-------------------------------------|
| RCV001293382        | 11                | 11835569     | 118373112  | Deletion    | P                              | P                                   |
| RCV001293373        | 9                 | 97834573     | 107199088  | Deletion    | P                              | P                                   |
| RCV001260503        | 10                | 81585301     | 89101700   | Deletion    | P                              | P                                   |
| RCV001374461        | 3                 | 68939251     | 72700418   | Deletion    | P                              | P                                   |
| RCV001293370        | 22                | 18886915     | 21463730   | Deletion    | P                              | P                                   |
| RCV001293366        | 22                | 18889490     | 21463730   | Deletion    | P                              | P                                   |
| RCV001314756        | 14                | 65937790     | 68354021   | Duplication | VUS                            | VUS                                 |
| RCV001301079        | 12                | 6945914      | 9027627    | Duplication | VUS                            | VUS                                 |
| RCV001295457        | 20                | 60831241     | 62664346   | Duplication | VUS                            | VUS                                 |
| RCV001172267        | 7                 | 72657228     | 74160300   | Deletion    | P                              | P                                   |
| RCV001293377        | 16                | 14968859     | 16363239   | Deletion    | P                              | P                                   |
| RCV001293368        | 22                | 42356886     | 43684002   | Deletion    | P                              | P                                   |
| RCV001293379        | 9                 | 139764148    | 141066491  | Deletion    | P                              | P                                   |
| RCV001260502        | 14                | 22006109     | 23241448   | Deletion    | VUS                            | VUS                                 |
| RCV001032318        | 2                 | 165946640    | 167168286  | Duplication | VUS                            | VUS                                 |
| RCV001031254        | 11                | 117856768    | 118972385  | Duplication | VUS                            | VUS                                 |
| RCV001304384        | 11                | 117856768    | 118972385  | Duplication | VUS                            | VUS                                 |
| RCV001346193        | 9                 | 34458994     | 35072710   | Duplication | VUS                            | VUS                                 |
| RCV001345686        | 9                 | 35683146     | 36277049   | Duplication | VUS                            | VUS                                 |
| RCV001172265        | X                 | 102632399    | 103221016  | Deletion    | P                              | P                                   |
| RCV001271073        | X                 | 69637865     | 70220983   | Duplication | VUS                            | VUS                                 |
| RCV001293374        | 15                | 75596353     | 76103430   | Deletion    | P                              | P                                   |
| RCV001031609        | 8                 | 74888367     | 75279355   | Duplication | VUS                            | VUS                                 |
| RCV001364734        | 21                | 44838130     | 45196150   | Duplication | VUS                            | VUS                                 |
| RCV001305754        | 1                 | 948954       | 1284445    | Duplication | VUS                            | VUS                                 |
| RCV001255130        | 3                 | 12630535     | 12808483   | Duplication | VUS                            | VUS                                 |
| RCV001032472        | X                 | 53276131     | 53449569   | Duplication | VUS                            | VUS                                 |
| RCV000803281        | 19                | 55644273     | 55768277   | Duplication | VUS                            | VUS                                 |
| RCV001033047        | 18                | 29078205     | 29178648   | Duplication | VUS                            | VUS                                 |
| RCV001305882        | 20                | 61990880     | 62078210   | Duplication | VUS                            | VUS                                 |
| RCV000824661        | 21                | 35736455     | 35821942   | Duplication | VUS                            | VUS                                 |
| RCV001031126        | 14                | 23856728     | 23885051   | Duplication | VUS                            | VUS                                 |
| RCV001370406        | 14                | 23861761     | 23889453   | Deletion    | VUS                            | VUS                                 |
| RCV001290038        | X                 | 154277426    | 154299480  | Deletion    | VUS                            | VUS                                 |
| RCV001033362        | 16                | 2089925      | 2098066    | Duplication | VUS                            | VUS                                 |
| RCV001200600        | 16                | 79245609     | 79245697   | Deletion    | VUS                            | VUS                                 |
| RCV001256153        | 15                | 90451636     | 90452607   | Deletion    | VUS                            | VUS                                 |
| RCV001257570        | 17                | 60683462     | 60722398   | Deletion    | LP                             | VUS                                 |
| RCV001257508        | 13                | 20802727     | 21034768   | Deletion    | P                              | VUS                                 |

|              |    |           |           |             |     |     |
|--------------|----|-----------|-----------|-------------|-----|-----|
| RCV001319817 | 5  | 136633338 | 140998481 | Duplication | VUS | LP  |
| RCV001031775 | 17 | 6589506   | 8151374   | Duplication | VUS | LP  |
| RCV001316565 | 16 | 624055    | 2153916   | Duplication | VUS | LP  |
| RCV001305099 | X  | 48382160  | 49856876  | Duplication | VUS | LP  |
| RCV000537451 | 20 | 61977556  | 62159505  | Deletion    | VUS | P   |
| RCV001300221 | 1  | 130980840 | 248900000 | Duplication | VUS | P   |
| RCV001325176 | 15 | 32964879  | 91358519  | Duplication | VUS | LP  |
| RCV001256147 | 6  | 116734559 | 123648104 | Deletion    | P   | VUS |
| RCV001290060 | 10 | 49033586  | 52417694  | Deletion    | LP  | VUS |
| RCV001172266 | 4  | 83196931  | 85540706  | Deletion    | P   | VUS |
| RCV001257507 | 13 | 20797127  | 21105945  | Deletion    | P   | VUS |
| RCV001199824 | 22 | 21822774  | 23025613  | Deletion    | P   | VUS |
| RCV001268958 | 17 | 54290100  | 54844894  | Deletion    | P   | VUS |
| RCV001270921 | 13 | 95209609  | 95292265  | Deletion    | P   | VUS |
| RCV001293383 | 14 | 86089631  | 88429727  | Deletion    | P   | VUS |
| RCV001293375 | 22 | 23699269  | 24992266  | Duplication | P   | VUS |
| RCV001199823 | 5  | 176517797 | 176779857 | Duplication | P   | VUS |
| RCV001270910 | X  | 30939526  | 31362638  | Duplication | B   | VUS |
| RCV000417215 | 16 | 204300    | 227000    | Deletion    | P   | VUS |
| RCV001078233 | 16 | 213800    | 230200    | Deletion    | P   | VUS |
| RCV001078235 | 16 | 221844    | 231553    | Deletion    | P   | VUS |
| RCV001078236 | 16 | 221999    | 231399    | Deletion    | P   | VUS |
| RCV001194694 | 2  | 228481316 | 228609111 | Deletion    | P   | VUS |
| RCV001268961 | X  | 153011909 | 153063825 | Deletion    | P   | VUS |
| RCV001095544 | 9  | 96160235  | 97428496  | Duplication | LP  | VUS |

P: pathogenic; LP: likely pathogenic; VUS: variants of uncertain significance; LB: likely benign; B: benign
